# Supplementary material for: Sociobehavioral, Biological, and Health Characteristics of Riverside People in the Xingu Region, Pará, Brazil
Source: MDPI journal article supplement (doi:10.3390/ijerph20085542), 2023-04-17
Supplement: s1 [file s1]

**Table S1.** List of variables used in the construction of the clustering model by the K-means algorithm.

| Variables                  | Description                                                                                                                                                                                                                                                                                                                                                                                                                                                                                                                               |
|----------------------------|-------------------------------------------------------------------------------------------------------------------------------------------------------------------------------------------------------------------------------------------------------------------------------------------------------------------------------------------------------------------------------------------------------------------------------------------------------------------------------------------------------------------------------------------|
| Sociodemographic variables | <ul style="list-style-type: none"> <li>- Literate or not;</li> <li>- Education level.</li> </ul>                                                                                                                                                                                                                                                                                                                                                                                                                                          |
| Biological variables       | <ul style="list-style-type: none"> <li>- Sex;</li> <li>- Age;</li> <li>- Ethnicity;</li> <li>- Body mass index (BMI);</li> <li>- Waist-hip ratio (WHR);</li> <li>- Systolic blood pressure (SBP) and Diastolic blood pressure (DBP);</li> <li>- Blood glucose;</li> <li>- Lipid profile: total cholesterol (TC), triglycerides (TG), high density lipoprotein (HDL), low density lipoprotein (LDL).</li> <li>- Diseases: dyslipidemia, arterial hypertension (SAH), diabetes (DM), stroke (CVA), cardiovascular disease (CVD).</li> </ul> |
| Behavioral variables       | <ul style="list-style-type: none"> <li>- Smoker or not;</li> <li>- Smoking time in years and daily frequency;</li> <li>- Consumption of alcoholic beverages and weekly frequency;</li> <li>- Weekly frequency of physical exercises;</li> <li>- Food consumption profile (healthy diet - including weekly consumption of fish, nuts, fruits, vegetables / bad diet - fried foods, soft drinks, sausages, among others).</li> </ul>                                                                                                        |
